# Supplementary material for: Examining the accuracy of methods for obtaining pressure dependent rate coefficients
Source: Royal Society of Chemistry journal article supplement (doi:10.1039/d2fd00040g), 2022-01-01
Supplement: d2fd00040g1.pdf [file d2fd00040g1.pdf]

# Examining the Accuracy of Methods for Obtaining Pressure Dependent Rate Coefficients Supplementary Information

Matthew S. Johnson and William H. Green\*

*Department of Chemical Engineering, Massachusetts Institute of Technology, Cambridge,  
MA 02139, United States*

E-mail: whgreen@mit.edu

## 1 CSE Derivations

$$\frac{d\mathbf{p}}{dt} = \mathbf{G}\mathbf{p} + \sum_{\nu} y_{A\nu}(t)y_{B\nu}(t)\mathbf{f}_{\nu} \quad (1)$$

where

$$\mathbf{f}_{\nu} = \mathbf{k}_{\nu \rightarrow} \mathbf{b}_{\nu} \quad (2)$$

where  $\mathbf{k}_{\nu \rightarrow}$  is the vector of loss coefficients from  $\nu$  to every other element of  $\mathbf{p}$  and  $\mathbf{b}_{\nu}$  is defined by

$$\mathbf{b}_{\nu_i} = \frac{\rho_{\nu}(E(i))e^{\frac{-E(i)}{RT}}}{\sum_j^{N_{grains}} \rho_{\nu}(E_j)e^{\frac{-E_j}{RT}}} \quad (3)$$

where  $\rho_{\nu}$  is the density of states,  $E(i)$  is the energy of the corresponding element of  $\mathbf{p}$ ,  $E_j$  is the  $j$ th energy level,  $R$  is the gas constant and  $T$  is the temperature. Eigendecomposing  $\mathbf{G}$  gives us eigenmatrix  $\mathbf{Q}$  such that

$$\mathbf{\Lambda} = \mathbf{Q}^{-1}\mathbf{G}\mathbf{Q} \quad (4)$$

where  $\mathbf{\Lambda}$  is diagonal with the eigenvalues of each eigenvector on the diagonal. if we define

$$\mathbf{v} = \mathbf{Q}^{-1}\mathbf{p} \quad (5)$$

we can transform Equation 1 into

$$\frac{d\mathbf{v}}{dt} = \mathbf{\Lambda}\mathbf{v} + \sum_{\nu} y_{A\nu}(t)y_{B\nu}(t)\mathbf{Q}^{-1}\mathbf{f}_{\nu} \quad (6)$$

At steady state each element of Equation 6 can be written as

$$\mathbf{v}_i = -\frac{1}{\Lambda_{ii}} \sum_{\nu} y_{A\nu}(t)y_{B\nu}(t)[\mathbf{Q}^{-1}\mathbf{f}_{\nu}]_i \quad (7)$$

while this isn't a good approximation for the values of the chemically significant eigenstates, it is a good approximation for the energy transfer associated eigenstates. We can write the flux to a particular bimolecular channel  $\nu$  as the sum of each element of  $\mathbf{p}$  times the rate coefficient from that element to  $\nu$  utilizing coordinate invariance we have

$$r_{\rightarrow\mu} = \langle \mathbf{p}, \mathbf{k}_{\rightarrow\mu} \rangle = \langle \mathbf{v}, \mathbf{Q}^{-1}\mathbf{k}_{\rightarrow\mu} \rangle \quad (8)$$

where  $\mathbf{k}_{\rightarrow\mu}$  is the vector of rate coefficients from each element of  $\mathbf{p}$  to channel  $\mu$ . As discussed in Georgievskii et al. 2013 the energy transfer associated components to Equation 8 are associated with bimolecular-bimolecular reactions while the chemically-significant eigenvalue components are associated with isomer-bimolecular reactions. Therefore, we can look specifically at the energy transfer associated components of Equation 8 and plug in Equation 7 to give

$$r_{\rightarrow\mu} = - \sum_i \sum_{\nu} \frac{1}{\Lambda_{ii}} y_{A\nu}(t)y_{B\nu}(t)[\mathbf{Q}^{-1}\mathbf{k}_{\rightarrow\mu}]_i [\mathbf{Q}^{-1}\mathbf{f}_{\nu}]_i \quad (9)$$

separating the component coming from each bimolecular input channel we get

$$k_{\nu \rightarrow \mu} y_{A\nu}(t) y_{B\nu}(t) = r_{\nu \rightarrow \mu} = - \sum_i \frac{1}{\Lambda_{ii}} y_{A\nu}(t) y_{B\nu}(t) [\mathbf{Q}^{-1} \mathbf{k}_{\rightarrow \mu}]_i [\mathbf{Q}^{-1} \mathbf{f}_\nu]_i \quad (10)$$

giving us

$$k_{\nu \rightarrow \mu} = - \sum_i \frac{1}{\Lambda_{ii}} [\mathbf{Q}^{-1} \mathbf{k}_{\rightarrow \mu}]_i [\mathbf{Q}^{-1} \mathbf{f}_\nu]_i \quad (11)$$

a formula for the bimolecular-bimolecular rate coefficients.

The remaining rate coefficients are derived from the chemically significant eigencomponents. We need rate coefficients of the form

$$\frac{d\mathbf{y}_i}{dt} = -\mathbf{y}_i \sum_j k_{i \rightarrow j} + \sum_{j \neq i} k_{j \rightarrow i} \mathbf{y}_j + \sum_\nu k_{\nu \rightarrow i} y_{A\nu} y_{B\nu} \quad (12)$$

where  $y_i$  is the total concentration of the  $i$ th isomer. In order to obtain  $\mathbf{y}$  we need to translate the chemically significant eigenstates into total concentrations. We do this by energy summing the chemically significant eigenvectors

$$\mathbf{W}_{ij} = \sum_{k \in \text{isomer } i} \mathbf{Q}_{kj} \quad j \in N_{cse} \quad (13)$$

generating a pseudo-eigenbasis for the chemical subspace. We can then define  $\mathbf{v}_{cse}$  as the vector of chemically significant eigenstates and write

$$\mathbf{y} \approx \mathbf{W} \mathbf{v}_{cse} \quad (14)$$

providing us a way to convert between total concentrations and the eigenstates. We can also rewrite Equation 6 as

$$\frac{d\mathbf{v}_{cse}}{dt} = \Lambda_{cse} \mathbf{v}_{cse} + \sum_\nu y_{A\nu}(t) y_{B\nu}(t) [\mathbf{Q}^{-1} \mathbf{f}_\nu]_{cse} \quad (15)$$

Let us consider the flux between two isomers

$$r_{isomers \rightarrow j} = \sum_{j \neq i} k_{i \rightarrow j} y_i = [\mathbf{W} \mathbf{\Lambda} \mathbf{v}_{cse}]_j \quad (16)$$

breaking this into components and expanding this into a matrix gives us

$$\mathbf{K} \mathbf{y} = \mathbf{W} \mathbf{\Lambda} \mathbf{v}_{cse} = \mathbf{W} \mathbf{\Lambda} \mathbf{W}^{-1} \mathbf{y} \quad (17)$$

where  $\mathbf{K}$  is the matrix of isomerization rate coefficients giving us

$$k_{i \rightarrow j} = [\mathbf{W} \mathbf{\Lambda} \mathbf{W}^{-1}]_{ij} \quad (18)$$

a formula for the isomerization rate coefficients.

Comparing the bimolecular components of equations 12 and 15 we have

$$\sum_{\nu} k_{\nu \rightarrow i} y_{A\nu}(t) y_{B\nu}(t) = [\mathbf{W} \sum_{\nu} y_{A\nu}(t) y_{B\nu}(t) [\mathbf{Q}^{-1} \mathbf{f}_{\nu}]_{cse}]_i \quad (19)$$

expanding into a vector we get

$$\sum_{\nu} y_{A\nu}(t) y_{B\nu}(t) \mathbf{k}_{\nu \rightarrow} = \sum_{\nu} y_{A\nu}(t) y_{B\nu}(t) \mathbf{W} [\mathbf{Q}^{-1} \mathbf{f}_{\nu}]_{cse} \quad (20)$$

where  $\mathbf{k}_{\nu \rightarrow}$  is the vector of rate constants from  $\nu$  to every isomer and breaking into components gives us

$$\mathbf{k}_{\nu \rightarrow} = \mathbf{W} [\mathbf{Q}^{-1} \mathbf{f}_{\nu}]_{cse} \quad (21)$$

or

$$k_{\nu \rightarrow i} = [\mathbf{W} [\mathbf{Q}^{-1} \mathbf{f}_{\nu}]_{cse}]_i \quad (22)$$

formulas for the bimolecular to isomer rate coefficients.

For the bimolecular to isomer rate coefficients we revisit Equation 8 and consider the

sum component associated with the chemically significant eigenvectors

$$r_{\rightarrow\mu} = \sum_i^{N_{cse}} v_{cse_i} [\mathbf{Q}^{-1} \mathbf{k}_{\rightarrow\mu}]_i = \sum_i^{N_{cse}} [\mathbf{W}^{-1} \mathbf{y}]_i [\mathbf{Q}^{-1} \mathbf{k}_{\rightarrow\mu}]_i = \sum_i^{N_{cse}} [\mathbf{Q}^{-1} \mathbf{k}_{\rightarrow\mu}]_i \sum_j \mathbf{W}_{ij}^{-1} \mathbf{y}_j \quad (23)$$

breaking up into components we have

$$r_{j\rightarrow\mu} = \sum_i^{N_{cse}} [\mathbf{Q}^{-1} \mathbf{k}_{\rightarrow\mu}]_i \mathbf{W}_{ij}^{-1} y_j = k_{j\rightarrow\mu} y_j \quad (24)$$

therefore we have

$$k_{j\rightarrow\mu} = \sum_i^{N_{cse}} [\mathbf{Q}^{-1} \mathbf{k}_{\rightarrow\mu}]_i \mathbf{W}_{ij}^{-1} \quad (25)$$

a formula for the isomer to bimolecular rate coefficients.
